# Supplementary material for: Effectiveness of manual therapies: the UK evidence report
Source: Springer Nature journal article supplement (doi:10.1186/1746-1340-18-3), 2010-02-25
Supplement: 12998_2009_105_MOESM5_ESM.pdf [file 12998_2009_105_MOESM5_ESM.pdf]

| Spinal Conditions                   | Intervention                                     | Evidence      |          |          |
|-------------------------------------|--------------------------------------------------|---------------|----------|----------|
|                                     |                                                  | Inconclusive  | Moderate | High     |
| Acute Low Back Pain                 | Spinal manipulation /mobilization                |               | positive |          |
| Chronic Low Back Pain               | Spinal manipulation /mobilization                |               |          | positive |
| Chronic Low Back Pain               | Massage                                          |               | positive |          |
| Chronic Low Back Pain               | Foot reflexology added to usual medical care     | non-favorable |          |          |
| Sciatica/ Radiating Leg Pain        | Spinal manipulation /mobilization                | favorable     |          |          |
| Coccydynia                          | Spinal manipulation                              | favorable     |          |          |
| Mid Back Pain                       | Spinal manipulation                              | favorable     |          |          |
| Acute/subacute Neck Pain            | Thoracic spinal manipulation/ mobilization       |               | positive |          |
| Acute Whiplash-Associated Disorders | Mobilization with exercise                       |               | positive |          |
| Chronic Neck Pain                   | Spinal manipulation /mobilization with exercise  |               | positive |          |
| Neck Pain of any duration           | Cervical spinal manipulation/ mobilization alone | favorable     |          |          |
| Chronic Neck Pain                   | Massage                                          |               | positive |          |
